# Supplementary material for: Evaluation of Hemoglobin Cutoff Levels to Define Anemia Among Healthy Individuals
Source: PubMed Central journal article supplement (PMC8346941; doi:10.1001/jamanetworkopen.2021.19123), 2021-08-06
Supplement: jamanetwopen-e2119123-s001.pdf [file jamanetwopen-e2119123-s001.pdf]

## Supplemental Online Content

Addo OY, Yu EX, Williams AM, et al. Evaluation of hemoglobin cutoff levels to define anemia among healthy individuals. *JAMA Netw Open*. 2021;4(8):e2119123.  
doi:10.1001/jamanetworkopen.2021.19123

### **eAppendix.** Supplemental Methods

**eFigure 1.** Hemoglobin (Hb) Distributions for Apparently Healthy and Overall Sample by Target Group With and Without Altitude and Smoking Adjustment

**eFigure 2.** Examination of Hb Assessment Method and Source of Blood on 5<sup>th</sup> Percentile (95% CI) of Hb Values in an Apparently Healthy Multinational Sample of Individuals

**eFigure 3.** Sensitivity Analyses Examining the Impact of Complex Survey Design Effects and Sampling Weights vs Unweighted Simple Random Sampling on 5<sup>th</sup> Percentile (95% CI) of Hb Values in an Apparently Healthy Multinational Sample of Individuals

**eTable 1.** Blood Sampling, Biomarkers and Laboratory Assessment Methods Across Surveys

**eTable 2.** Included Surveys and Participant Descriptive Characteristics: Preschool Children Aged 6-59 Months

**eTable 3.** Included Surveys and Participant Descriptive Characteristics: Non-Pregnant Women of Reproductive Aged 15-49 y

**eTable 4.** Results of One-Way Quantile Test Comparing Survey-Specific 5<sup>th</sup> Percentile Hb With Current WHO Hb Cutoffs for Defining Anemia in a Multinational Sample of Apparently Healthy Individuals

**eTable 5.** Associations Between Hb Concentrations With Participant Age, Hb Analyzer, Type of Blood Sampling in a Multinational Sample of Apparently Healthy Individuals

This supplemental material has been provided by the authors to give readers additional information about their work.

## **eAppendix. Supplemental Methods**

### **Laboratory Methods**

Venous or capillary blood was collected in the 30 surveys (not all had both target groups) examined. Hb was assessed with automated hematology analyzers in 4 surveys (US, Great Britain, China, and Ecuador) and point-of-care Hemocue in 26 surveys (i.e., thirteen Hemocue model 201+, four Hemocue model 301, four Hemocue model Hb-B, and 5 surveys did not specify the Hemocue model number). Ferritin, soluble transferrin receptor (sTfR), retinol, retinol binding protein (RBP), and inflammatory biomarkers (alpha-1-acid glycoprotein [AGP] or C-reactive protein [CRP]) were also assessed, although the selection of biomarkers varied by survey (**eTable 1**). Ferritin, sTfR, RBP, CRP, and AGP were measured with ELISA or immunoassay techniques, and retinol was assessed with high-performance liquid chromatography (HPLC).<sup>61, 62</sup> sTfR values were based on Ramco assay or converted from Roche to Ramco assay concentrations. Malaria was assessed with rapid test kits based on malaria antigen (HRP2/pLDH) combo for *Plasmodium falciparum* and *Plasmodium Vivax*.

### **Sensitivity Analyses**

First, for the Hb threshold objective, we first compared Hb distributions by using density plots to assess whether the distribution of the overall population Hb was left-shifted compared to the healthy subsample. Second, to assess the appropriateness of pooling data of healthy individuals, we examined ICC at other quantiles (at mean, and 95<sup>th</sup> percentile) of Hb distribution by using mixed models. Third, we tested for the equality of pooled effect sizes for survey-specific derived 5<sup>th</sup> percentile Hb values contrasted against pooled values derived from the Hb assessment method stratified analyses (i.e., automated hematology analyzer, Hemocue model 201+, Hemocue 301, Hemocue-Hb-B, or Hemocue but no model number listed: survey-stratified vs Hb method or blood

source stratified estimates). Fourth, we evaluated if the Hb assessment method or the blood source (venous or peripheral/capillary) was associated with 5<sup>th</sup> percentile Hb concentrations by using mixed models with the surveys as random effects. Fifth, because ferritin <12 ng/mL and <15 ng/mL has been shown to have low sensitivity and specificity in comparison to bone marrow assessment (the gold standard), therefore we examined results by using higher cutoffs to define ID (with ferritin <20 ng/mL & 30 ng/mL for children; and 30, ng/mL, 50 ng/mL, and 100 ng/mL for women)<sup>36, 63</sup> and VAD for apparently healthy children and women (RBP or retinol <1.05 μmol/L [to convert to micromoles per deciliter, divide by 0.0349]).<sup>25</sup> Sixth, we conducted Hb 5<sup>th</sup> percentile and meta-analyses by using the original survey sampling weights with complex design effects, where applicable, and we compared results with unweighted analysis (with SRS).

As shown in table 3 and supplemental figures 1-3, all sensitivity analyses regarding the pooled 5<sup>th</sup> percentile Hb (objective a and b) suggested that our results are robust. Further, Table 3 indicated neither the use of higher thresholds to define ID and VAD nor Hb assessment method and blood source significantly alter the pooled 5<sup>th</sup> percentile Hb (**eFigure 2**). Analyses accounting for complex survey design (i.e., cluster, strata, weight) yielded pooled 5<sup>th</sup> percentile Hb estimates that were not statistically different from the unweighted analyses that assumed SRS (**eFigure 3**).

**eFigure 1. Hemoglobin (Hb) Distributions for Apparently Healthy and Overall Sample by Target Group With and Without Altitude and Smoking Adjustment**

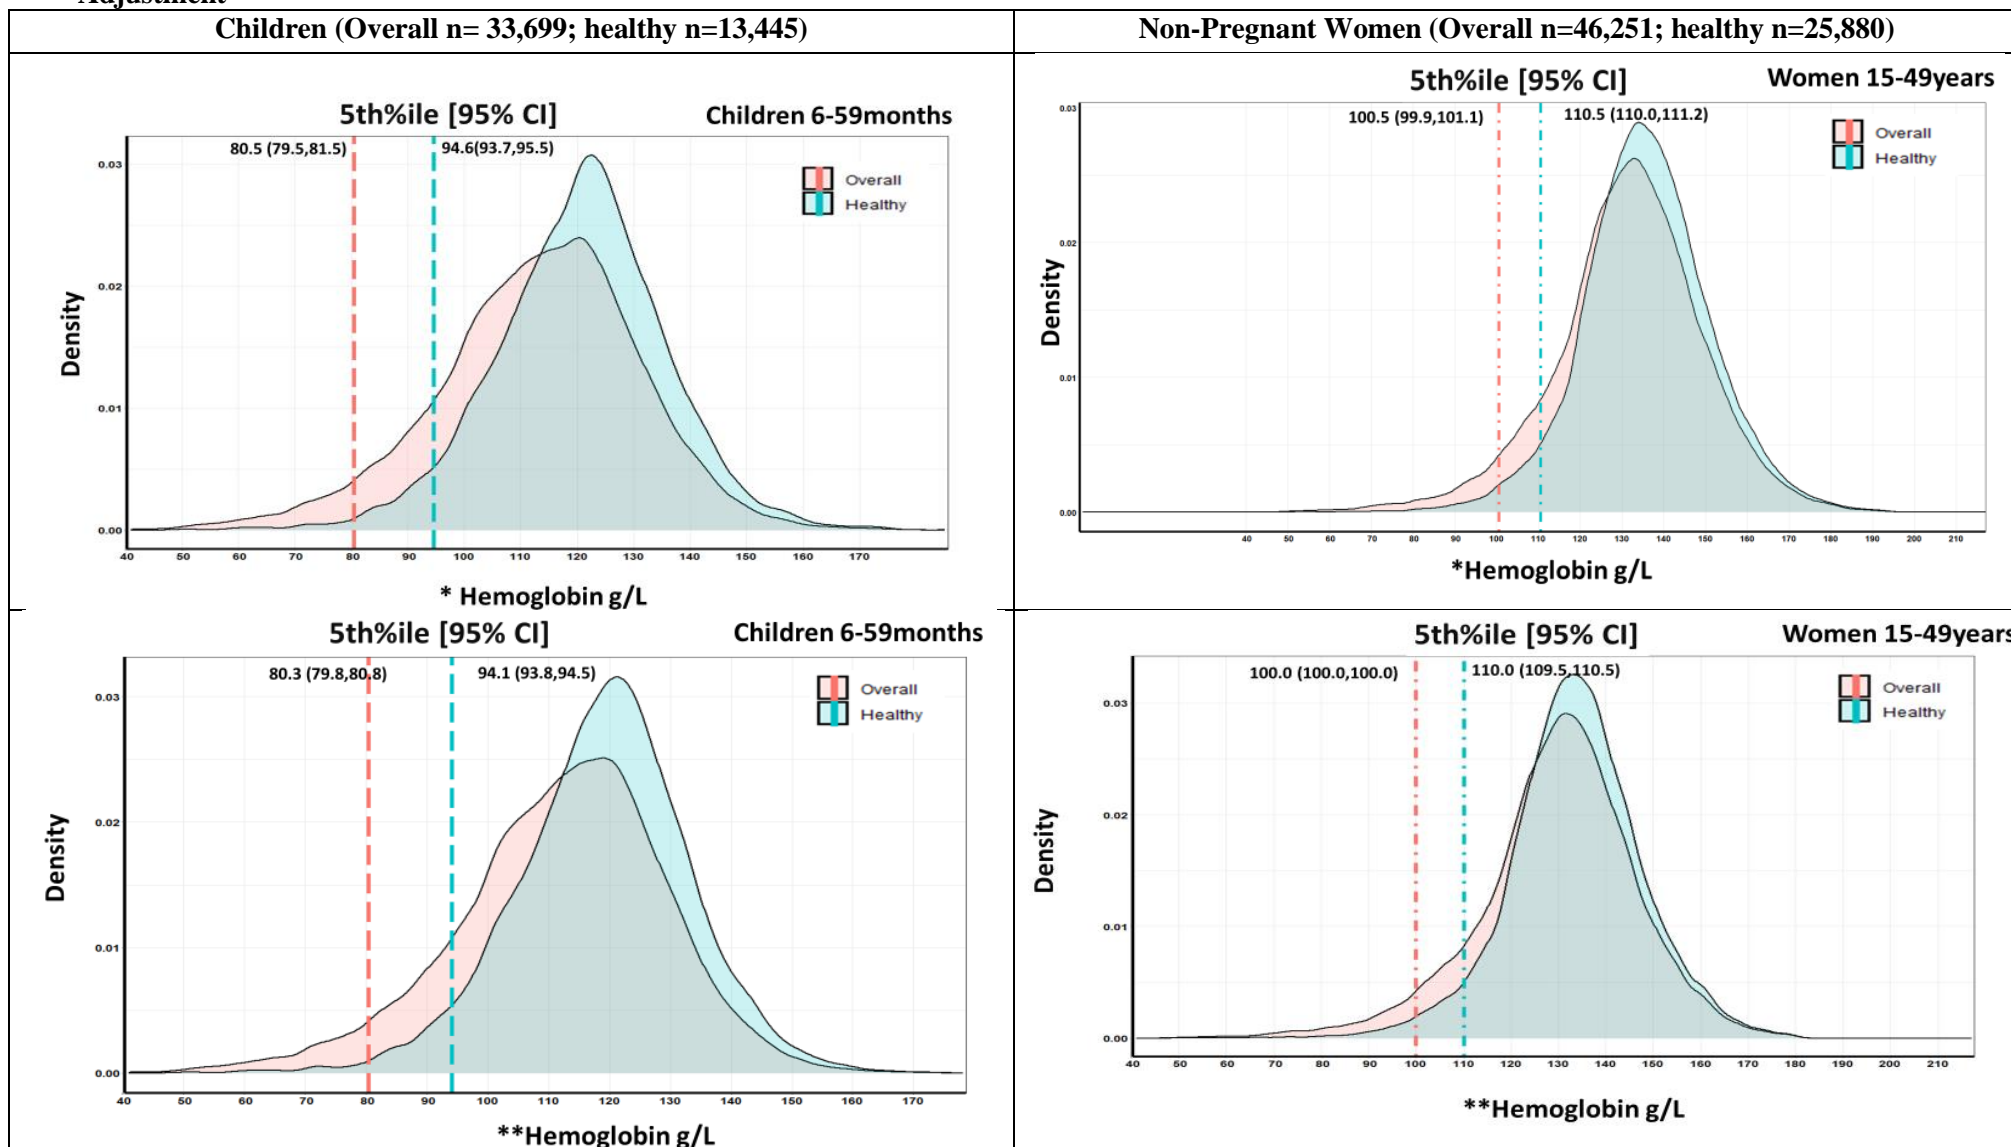

\*Unadjusted Hb values (to convert Hb to grams per deciliter, divide by 10). \*\*Hb adjusted for 1) altitude when available (Afghanistan, Azerbaijan, Colombia, Ecuador, Great Britain, Laos, Malawi, Mexico 2006 and 2012, and Rwanda) otherwise no adjustment was applied or <1000m so no adjustment needed, and 2) smoking (Colombia, Ecuador, Mexico 06 and 2012, Great Britain and USA). Healthy defined as no inflammation (CRP ≤ 5 mg/L or AGP ≤ 1 g/L), no iron deficiency (based on ferritin <12 ng/mL for children and <15 ng/mL for women), no vitamin A deficiency (based on RBP or retinol ≥20.1 μg/dL [to convert to micromoles per liter, multiply by 0.0349]) when available, and no known malaria.

**Figure 2: Examination of Hb Assessment Method and Source of Blood on 5<sup>th</sup> Percentile (95% CI) of Hb Values in an Apparently Healthy Multinational Sample of Individuals**

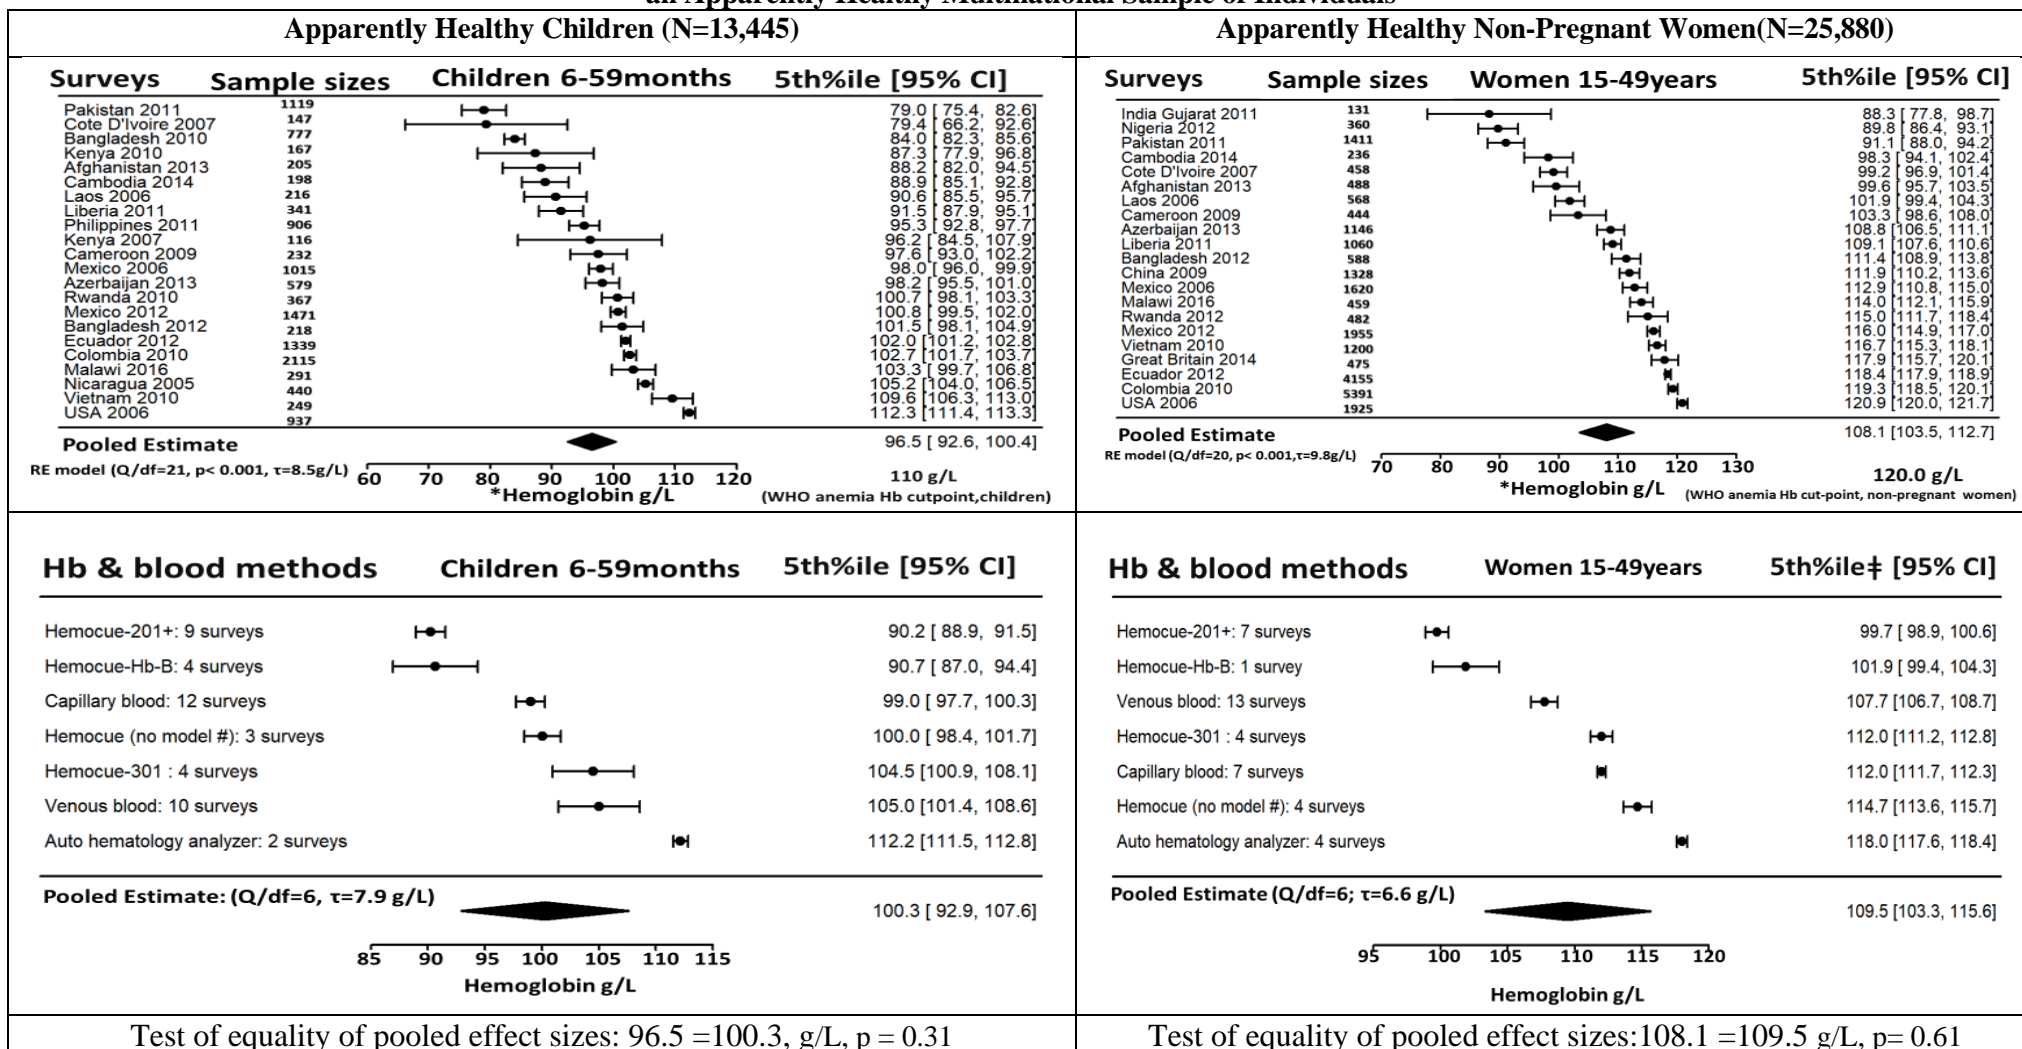

Test of equality of pooled effect sizes:  $96.5 = 100.3$ , g/L,  $p = 0.31$

Test of equality of pooled effect sizes:  $108.1 = 109.5$  g/L,  $p = 0.61$

Abbreviations and definitions: Healthy defined as no inflammation (C-reactive protein  $\leq 5$  mg/L or alpha-1acid glycoprotein  $\leq 1$  g/L), no iron deficiency (based on ferritin  $<12$  ng/mL for children and  $<15$  ng/mL for women), no vitamin A deficiency (based on RBP or retinol  $\geq 20.1$   $\mu$ g/dL [to convert to micromoles per liter, multiply by 0.0349], when available), and no known malaria. RE, random effects model. Q/df, Test of Cochran's Q statistic for heterogeneity at the given degrees of freedom (DF). For HemoCue and blood source stratified analyses, count of surveys labeled on the Forest plots are based on healthy subpopulation, after data exclusions (i.e. slightly different from counts on supplemental Table 1).

Standard errors, SE (and 95% CI) around Hb 5%ile were based on the Wald SE of the estimated proportion below the quantile at a design effect of 1 (for SRS). Hb values (to convert Hb to grams per deciliter, divide by 10) were adjusted for altitude when available (Afghanistan, Azerbaijan, Colombia, Ecuador, Great Britain, Laos, Malawi, Mexico 2006 and 2012, and Rwanda) otherwise no adjustment was applied or  $<1000$ m so no adjustment needed. Hb values further adjusted for smoking among women (Colombia, Ecuador, Mexico 2006 and 2012, Great Britain and USA).

**eFigure 3: Sensitivity Analyses Examining the Impact of Complex Survey Design Effects and Sampling Weights vs Unweighted Simple Random Sampling on 5th Percentile (95% CI) of Hb Values in an Apparently Healthy Multinational Sample of Individuals.**

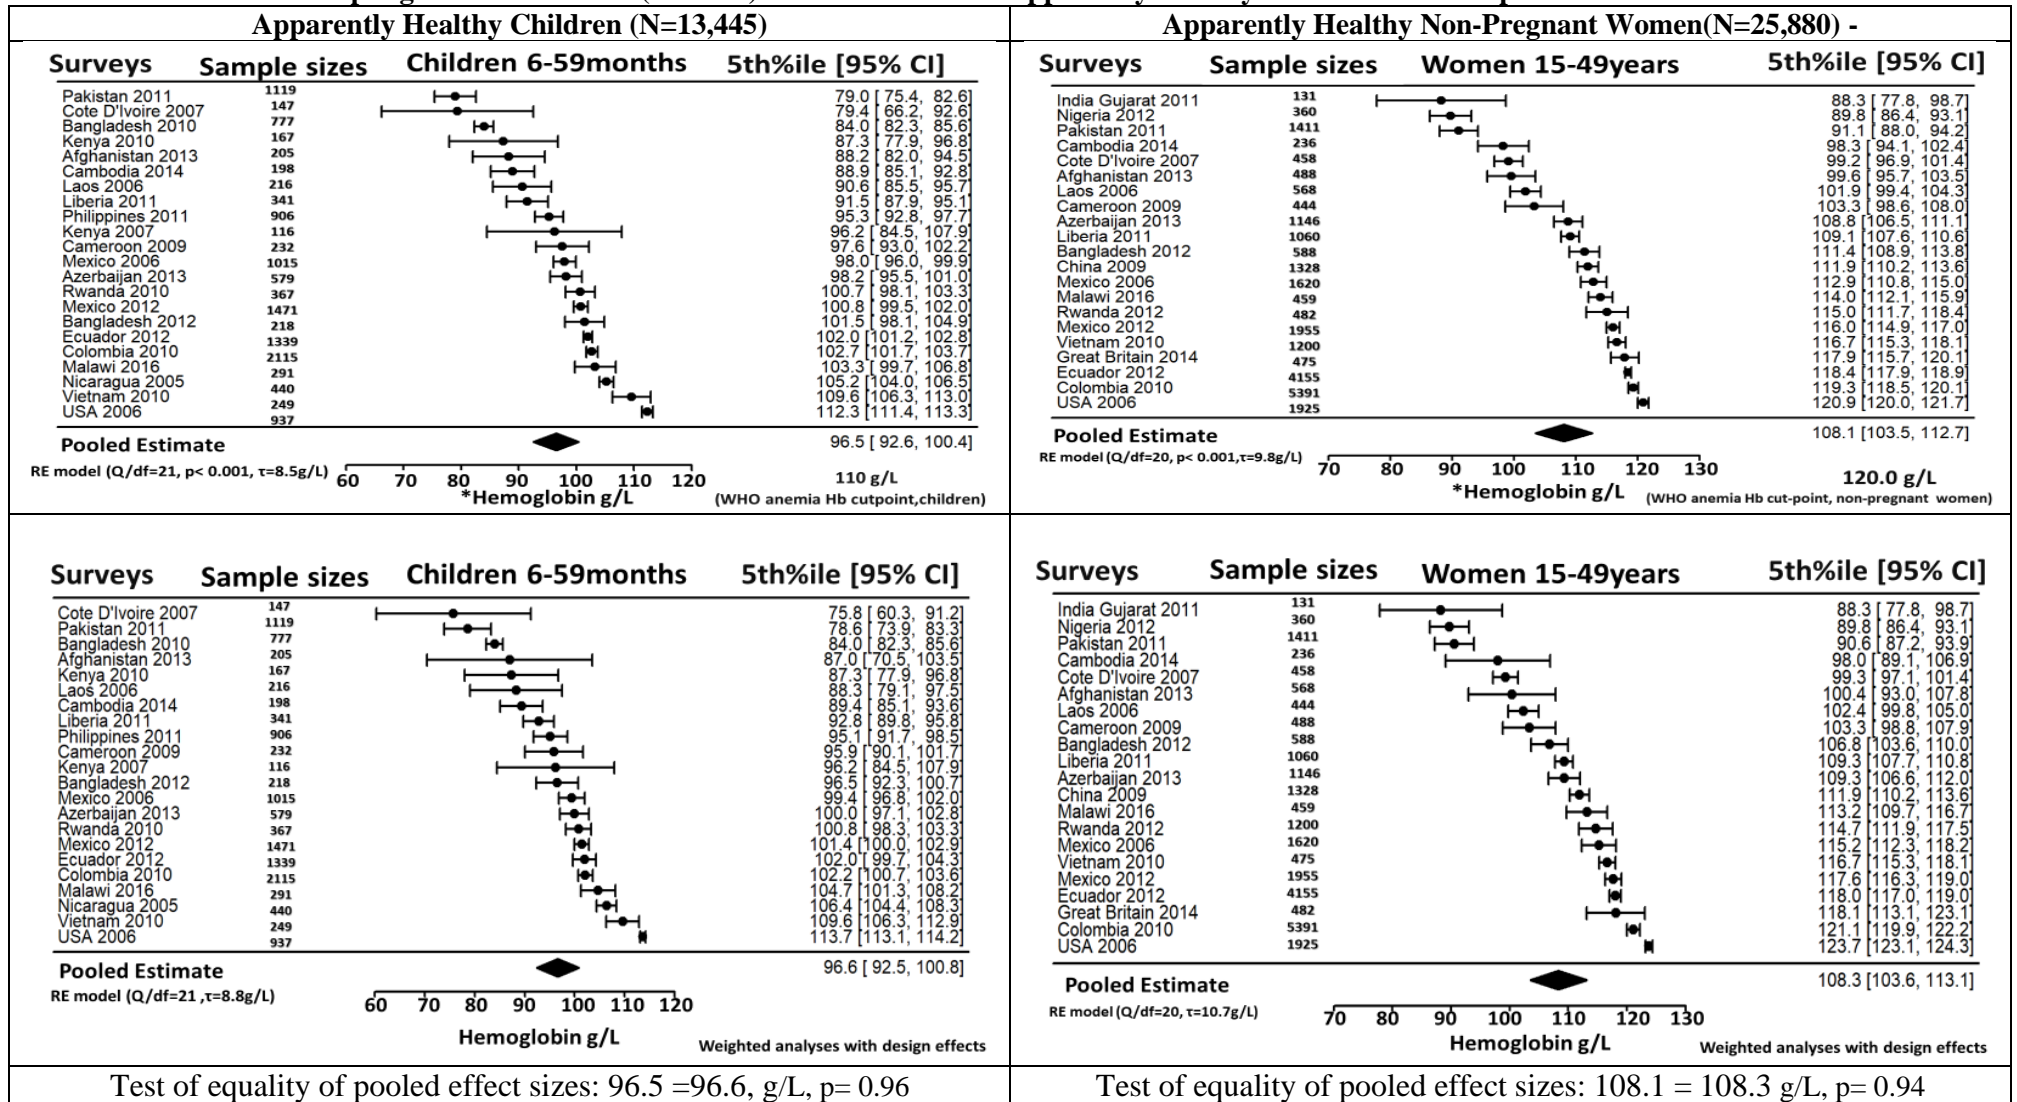

Test of equality of pooled effect sizes: 96.5 = 96.6, g/L, p= 0.96

Test of equality of pooled effect sizes: 108.1 = 108.3 g/L, p= 0.94

Healthy defined as no inflammation (C-reactive protein  $\leq 5$  mg/dL [to convert to milligrams per liter, multiply by 10] or  $\alpha$ -1-acid glycoprotein  $\leq 1$  g/L), no iron deficiency (based on ferritin  $<12$  ng/mL for children and  $<15$  ng/mL for women), no vitamin A deficiency (based on RBP or retinol  $\geq 20.1$   $\mu$ g/dL [to convert to micromoles per liter, multiply by 0.0349], when available), and no known malaria. RE, random effects model. Q/df, Test of Cochran's Q statistic for heterogeneity at the given degrees of freedom (DF). Standard errors, SE (and 95% CI) around Hb 5%ile were based on the Wald SE of the estimated proportion below the quantile at a design effect of 1 (for SRS). Hb values (to convert to grams per deciliter, divide by 10) were adjusted for altitude when available (Afghanistan, Azerbaijan, Colombia, Ecuador, Great Britain, Laos, Malawi, Mexico 2006 and 2012, and Rwanda) otherwise no adjustment was applied or  $<1000$ m so no adjustment needed. Hb values further adjusted for smoking among women (Colombia, Ecuador, Mexico 06 and 2012, Great Britain and USA).

**eTable 1: Blood Sampling, Biomarkers and Laboratory Assessment Methods Across Surveys**

| Survey                | Population | Blood Sample | Biomarker and Laboratory Assessment Method |          |              |              |     |                |              |
|-----------------------|------------|--------------|--------------------------------------------|----------|--------------|--------------|-----|----------------|--------------|
|                       |            |              | Hemoglobin                                 | Retinol  | Ferritin     | sTfR         | RBP | CRP            | AGP          |
| Afghanistan 2013      | PSC, WRA   | Venous       | HemoCue® 201+                              | HPLC     | TIA          | N/A          |     | Immunoassay    | TIA          |
| Azerbaijan 2013       | PSC, WRA   | Capillary    | HemoCue® 201+                              | N/A      |              |              |     | ELISA          |              |
| Bangladesh 2010       | PSC        | Capillary    | HemoCue® 201+                              | N/A      |              |              |     | ELISA          |              |
| Bangladesh 2012       | PSC, WRA   | Venous       | HemoCue® 301                               | HPLC     | ELISA        | N/A          |     | ELISA          |              |
| Burkina Faso 2010     | PSC, WRA   | Venous       | HemoCue® 201+                              | HPLC     | Turbidimetry | ELISA        |     | Turbidimetry   | Turbidimetry |
| Cambodia 2014         | PSC, WRA   | Capillary    | HemoCue® 301                               | N/A      |              |              |     | ELISA          |              |
| Cameroon 2009         | PSC, WRA   | Venous       | HemoCue® 201+                              | HPLC     |              |              |     | ELISA          |              |
| China 2009            | WRA        | Venous       | Coulter™ AHA                               | N/A      | RIA          | Nephelometry | N/A | ITA            | N/A          |
| Colombia 2010         | PSC, WRA   | Capillary    | HemoCue®                                   | HPLC†    | CLIA         | CLIA         | NA  | Immunoassay    | N/A          |
| Cote d'Ivoire 2007    | PSC, WRA   | Venous       | HemoCue® 201+                              | N/A      |              |              |     | ELISA          |              |
| Ecuador 2012          | PSC, WRA   | Venous       | AHA                                        | HPLC     | CLIA         | N/A          |     | Nephelometry   | N/A          |
| Great Britain 2014    | WRA        | Venous       | Coulter™ AHA                               | HPLC     | Immunoassay  | EIA          | N/A | PETIA          | N/A          |
| India Gujarat 2011    | WRA        | Venous       | HemoCue®                                   | N/A      | ITA          | ELISA        | N/A | ITA            | ITA          |
| Kenya 2007            | PSC        | Capillary    | HemoCue® Hb-B                              | N/A      |              |              |     | ELISA          |              |
| Kenya 2010            | PSC        | Capillary    | HemoCue® Hb-B                              | N/A      |              |              |     | ELISA          |              |
| Laos 2006             | PSC, WRA   | Capillary    | HemoCue® 201+                              | N/A      | ELISA        |              | N/A | Sandwich ELISA |              |
| Liberia 2011          | PSC, WRA   | Capillary    | HemoCue® Hb-B                              | N/A      |              |              |     | ELISA          |              |
| Malawi 2016           | PSC, WRA   | Venous       | HemoCue® 301                               | HPLC     |              |              |     | ELISA          |              |
| Mexico 2006           | PSC, WRA   | Capillary    | HemoCue®                                   | N/A      | Immunoassay  | Immunoassay  | N/A | Nephelometry   | N/A          |
| Mexico 2012           | PSC, WRA   | Capillary    | HemoCue®                                   | HPLC†    | CMIA         | N/A          | N/A | Nephelometry   | N/A          |
| Mongolia 2006         | PSC        | Venous       | HemoCue®                                   | N/A      | Immunoassay  |              | N/A |                | Turbidimetry |
| Nigeria 2012          | PSC, WRA   | Venous       | HemoCue® 201+                              | RP-HPLC  |              |              |     | Sandwich ELISA |              |
| Nicaragua 2005        | PSC        | Capillary    | HemoCue® Hb-B                              | HPLC     | Immunoassay  |              | N/A |                | Turbidimetry |
| Papua New Guinea 2005 | PSC, WRA   | Capillary    | HemoCue® 201+                              | N/A      | N/A          |              |     | ELISA          |              |
| Philippines 2011      | PSC        | Capillary    | HemoCue® 201+                              | N/A      |              |              |     | ELISA          |              |
| Pakistan 2011         | PSC, WRA   | Venous       | HemoCue® 201+                              | HPLC     | Turbidimetry | Unknown‡     | N/A | Immunoassay‡   | Turbidimetry |
| Rwanda 2010           | PSC, WRA   | Venous       | HemoCue® 201+                              | N/A      |              |              |     | ELISA          |              |
| United States 2003-06 | PSC, WRA   | Venous       | Coulter™ AHA                               | RP-HPLC‡ | IRMA         | ITA          | N/A | Nephelometry   | N/A          |
| Vietnam 2010          | PSC, WRA   | Venous       | HemoCue® 301                               | RP-HPLC  | ELISA        | N/A          | N/A | ELISA          | N/A          |
| Zambia 2009           | PSC        | Venous       | HemoCue® 201+                              | HPLC     | ELISA        |              | N/A | RID            | RID          |

Abbreviations: PSC, Preschool children 6-59 months. WRA, non-pregnant women of reproductive age 15-49 years, sTfR, soluble transferrin receptor. RBP, retinol binding protein. CRP, C-reactive protein. AGP, alpha-lacid glycoprotein. AHA, automated hematology analyzer. N/A, indicator not assessed in survey. CLIA, chemiluminescent immunoassay. CMIA, chemiluminescent microparticle immunoassay. EIA, enzyme immunoassay. ELISA, enzyme-linked immunosorbent assay. HPLC, high performance liquid chromatography. IRMA, immunoradiometric assay. ITA, immunoturbidimetric assay. PETIA, particle enhanced turbidimetric immunoassay. RIA, radioimmunoassay. RID, radial immunodiffusion. RP-HPLC, reversed phase chromatography. TIA, turbidimetric immunoassay. † Measured in PSC only. ‡ Measured in WRA only.

**eTable 2. Included Surveys and Participant Descriptive Characteristics: Preschool Children Aged 6-59 Months**

| Survey/Country                        | Overall Study Sample (33,699) – No exclusions |                           |           |         |          |           |              |             | Apparently Healthy** Analytic Sub-sample (13,445) |                           |           |             |               |
|---------------------------------------|-----------------------------------------------|---------------------------|-----------|---------|----------|-----------|--------------|-------------|---------------------------------------------------|---------------------------|-----------|-------------|---------------|
|                                       | N                                             | Age, Mo<br>Mean (min-max) | Male<br>% | ID<br>% | VAD<br>% | INFL<br>% | Malaria<br>% | Anemia<br>% | N                                                 | Age, Mo<br>Mean (min-max) | Male<br>% | Anemia<br>% | %<br>Excluded |
| <b>Afghanistan 2013</b>               | 601                                           | 28.5 (6.0,58.0)           | 53.2      | 20.0    | 52.6     | 26.5      | NA           | 40.4        | 205                                               | 29.4 (6.4,58.0)           | 53.2      | 31.7        | 65.9          |
| <b>Azerbaijan 2013</b>                | 1052                                          | 35.5 (6.0,59.0)           | 55.9      | 16.4    | 9.1      | 28.2      | NA           | 24.9        | 579                                               | 37.1 (6.0,59.0)           | 53.5      | 16.1        | 45.0          |
| <b>Bangladesh 2010</b>                | 1491                                          | 8.3 (6.0,11.0)            | 49.3      | 8.0     | 17.0     | 35.7      | NA           | 83.5        | 777                                               | 8.3 (6.0,11.0)            | 47.7      | 79.2        | 47.9          |
| <b>Bangladesh 2012</b>                | 435                                           | 36.9 (6.0,59.0)           | 54.0      | 13.3    | 28.7     | 29.2      | NA           | 24.6        | 218                                               | 39.4 (6.0,59.0)           | 50.9      | 15.1        | 49.9          |
| <b>Burkina Faso 2010**</b>            | 124                                           | 48.5 (35.7,59.6)          | 48.4      | 0.0     | 39.5     | 91.9      | 15.0         | 71.8        | 2**                                               | 47.6 (35.9,59.3)          | 0.0       | 100.0       | 98.4          |
| <b>Cote d'Ivoire 2007</b>             | 742                                           | 31.6 (6.0,59.0)           | 54.2      | 11.6    | 25.3     | 69.1      | 28.2         | 73.3        | 147                                               | 33.0 (6.0,59.0)           | 51.7      | 55.1        | 80.2          |
| <b>Cambodia 2014</b>                  | 408                                           | 36.1 (6.1,59.9)           | 55.6      | 4.4     | 10.3     | 39.7      | --           | 52.2        | 198                                               | 37.3 (6.5,59.4)           | 52.0      | 47.0        | 51.5          |
| <b>Cameroon 2009</b>                  | 762                                           | 30.9 (12.0,59.9)          | 50.9      | 15.7    | 30.6     | 46.9      | 24.6         | 54.1        | 232                                               | 33.1 (12.0,59.9)          | 50.2      | 20.7        | 69.6          |
| <b>Colombia 2010</b>                  | 3792                                          | 37.9 (12.0,59.0)          | 52.8      | 10.2    | 25.8     | 19.1      | NA           | 13.6        | 2115                                              | 39.6 (12.0,59.0)          | 53.2      | 11.1        | 44.2          |
| <b>Ecuador 2012</b>                   | 2015                                          | 30.0 (6.0,59.0)           | 50.5      | 9.4     | 20.9     | 12.2      | NA           | 22.5        | 1339                                              | 31.7 (6.0,59.0)           | 49.4      | 15.2        | 33.5          |
| <b>Kenya 2007</b>                     | 873                                           | 20.0 (6.0,36.0)           | 52.8      | 38.8    | 23.0     | 65.5      | 19.9         | 66.9        | 116                                               | 20.4 (6.0,35.9)           | 48.3      | 33.6        | 86.7          |
| <b>Kenya 2010</b>                     | 843                                           | 21.5 (6.0,35.0)           | 50.2      | 19.2    | 29.5     | 61.8      | 32.5         | 71.5        | 167                                               | 22.1 (6.0,35.0)           | 47.3      | 43.7        | 80.2          |
| <b>Laos 2006</b>                      | 479                                           | 33.1 (6.0,59.0)           | 50.1      | 18.0    | N/A      | 42.8      | NA           | 40.3        | 216                                               | 37.6 (7.0,59.0)           | 44.9      | 35.2        | 54.9          |
| <b>Liberia 2011</b>                   | 1433                                          | 19.9 (6.0,35.9)           | 50.2      | 21.8    | 24.5     | 55.8      | 24.3         | 58.1        | 341                                               | 18.5 (6.0,35.9)           | 49.6      | 38.4        | 76.2          |
| <b>Mongolia 2006**</b>                | 194                                           | 20.1 (6.6,35.8)           | 52.6      | 36.1    | 36.6     | 25.8      | NA           | 23.7        | 60**                                              | 21.9 (7.0,35.8)           | 50.0      | 13.3        | 69.1          |
| <b>Malawi 2016</b>                    | 1087                                          | 32.9 (6.0,59.0)           | 51.0      | 10.2    | 24.1     | 58.9      | 26.6         | 31.3        | 291                                               | 37.7 (6.0,59.0)           | 50.2      | 13.1        | 73.2          |
| <b>Mexico 2006</b>                    | 1590                                          | 40.9 (12.7,59.9)          | 52.3      | 26.2    | N/A      | 11.2      | NA           | 20.4        | 1015                                              | 42.4 (12.7,59.9)          | 51.4      | 16.9        | 36.2          |
| <b>Mexico 2012</b>                    | 2204                                          | 38.9 (12.0,59.9)          | 49.9      | 13.9    | 16.9     | 10.6      | NA           | 16.9        | 1471                                              | 39.9 (12.0,59.9)          | 48.3      | 15.0        | 33.3          |
| <b>Nigeria 2012**</b>                 | 546                                           | 30.7 (6.0,59.0)           | 50.1      | 5.1     | 42.9     | 63.2      | 35.2         | 74.7        | 85**                                              | 31.1 (10.0,59.0)          | 44.0      | 51.8        | 84.4          |
| <b>Nicaragua 2005</b>                 | 953                                           | 33.3 (6.1,59.9)           | 50.4      | 33.1    | 4.2      | 25.7      | NA           | 16.6        | 440                                               | 36.6 (6.4,59.8)           | 49.3      | 11.1        | 53.8          |
| <b>P. New Guinea 2005<sup>†</sup></b> | 934                                           | 31.0 (6.0,59.8)           | 54.0      | N/A     | 24.8     | 57.7      | NA           | 50.1        | NA                                                | N/A                       | .         | .           | 100.0         |
| <b>Philippines 2011</b>               | 1767                                          | 14.8 (6.0,24.0)           | 50.1      | 23.0    | 8.3      | 27.9      | NA           | 43.0        | 906                                               | 15.0 (6.0,24.0)           | 48.0      | 28.8        | 48.7          |
| <b>Pakistan 2011</b>                  | 6915                                          | 27.4 (6.0,59.0)           | 52.0      | 46.1    | 53.2     | 35.0      | NA           | 60.5        | 1119                                              | 29.3 (6.0,59.0)           | 50.3      | 46.2        | 83.8          |
| <b>Rwanda 2010</b>                    | 576                                           | 34.7 (6.0,59.0)           | 47.5      | 5.2     | 11.1     | 28.8      | NA           | 27.1        | 367                                               | 35.6 (6.0,59.0)           | 45.3      | 19.6        | 36.3          |
| <b>United States 2003-06</b>          | 1135                                          | 35.8 (12.0,59.0)          | 50.6      | 11.2    | N/A      | 6.4       | NA           | 3.1         | 937                                               | 37.1 (12.0,59.0)          | 50.2      | 1.6         | 17.4          |
| <b>Vietnam 2010</b>                   | 360                                           | 37.3 (10.4,59.7)          | 52.9      | 13.9    | 6.9      | 12.8      | NA           | 7.5         | 249                                               | 39.2 (12.7,59.7)          | 52.2      | 4.0         | 30.8          |
| <b>Zambia 2009**</b>                  | 388                                           | 35.3 (6.0,59.6)           | 58.2      | 4.1     | 56.7     | 76.0      | 18.8         | 51.8        | 50**                                              | 33.5 (6.4,59.5)           | 54.0      | 22.0        | 87.1          |

Abbreviations and definitions: Anemia based on hemoglobin (Hb) <110 g/L after Hb adjusted for altitude when available (Afghanistan, Azerbaijan, Colombia, Ecuador, Laos, Malawi, Mexico 2006 and 2012, and Rwanda) otherwise no adjustment was applied or <1000 m was assumed. ID, iron deficiency based on ferritin <12 ng/mL; N/A, indicator not applicable; VAD, vitamin A deficiency based on retinol binding protein (RBP) or retinol <20.1 µg/dL (to convert to micromoles per liter, multiply by 0.0349), INFL, inflammation based on C-reactive protein > 0.5 mg/dL (to convert to milligrams per liter, multiply by 10) or α-1-acid glycoprotein >1 g/L. \*\* Healthy defined as no inflammation, ID, VAD or malaria, if measured. Surveys dropped for Hb threshold analyses due to <100 “healthy” individuals. The Hb-sTfR curve analyses was based on data from all 17 surveys for children and 17 surveys for women. The Hb threshold analyses were based on 22 surveys or 21 countries except for Burkina Faso, Mongolia, Nigeria, Papua N Guinea, and Zambia, which did not meet the inclusion criteria or did not have enough (>100) sample sizes after the exclusions.



**eTable 3. Included Surveys and Participant Descriptive Characteristics: Non-Pregnant Women of Reproductive Aged 15-49 y**

| Survey/Country                           | Overall Study Sample (46,251) – No exclusions |                            |         |          |           |              |             | Apparently Healthy** Analytic Sub-sample (25,880) |                            |             |               |
|------------------------------------------|-----------------------------------------------|----------------------------|---------|----------|-----------|--------------|-------------|---------------------------------------------------|----------------------------|-------------|---------------|
|                                          | N                                             | Age, Yr.<br>Mean (min-max) | ID<br>% | VAD<br>% | INFL<br>% | Malaria<br>% | Anemia<br>% | N                                                 | Age, Yr.<br>Mean (min-max) | Anemia<br>% | %<br>Excluded |
| <b>Afghanistan 2013</b>                  | 950                                           | 30.9 (15.0,49.0)           | 26.6    | 11.5     | 20.3      | N/A          | 41.9        | 488                                               | 30.8 (15.0,49.0)           | 34.6        | 48.6          |
| <b>Azerbaijan 2013</b>                   | 2650                                          | 32.2 (15.0,49.9)           | 31.7    | 0.6      | 33.5      | N/A          | 36.6        | 1146                                              | 31.3 (15.0,49.9)           | 18.8        | 56.8          |
| <b>Bangladesh 2012</b>                   | 865                                           | 29.2 (15.0,49.0)           | 8.8     | 8.7      | 19.2      | N/A          | 23.4        | 588                                               | 29.4 (15.0,49.0)           | 17.5        | 32.0          |
| <b>Burkina Faso 2010**</b>               | 127                                           | 31.7 (20.0,49.0)           | 3.1     | 14.2     | 76.4      | 61.1         | 39.4        | 17**                                              | 31.4 (20.0,43.0)           | 41.2        | 86.6          |
| <b>Cote d'Ivoire 2007</b>                | 828                                           | 27.9 (15.0,48.0)           | 12.9    | 0.8      | 32.9      | 4.8          | 50.6        | 458                                               | 28.2 (15.0,48.0)           | 42.4        | 44.7          |
| <b>Cambodia 2014</b>                     | 433                                           | 30.1 (16.0,49.0)           | 2.3     | 3.7      | 41.1      | N/A          | 43.2        | 236                                               | 30.3 (16.0,48.0)           | 42.8        | 45.5          |
| <b>Cameroon 2009</b>                     | 749                                           | 27.1 (15.0,47.5)           | 14.4    | 2.1      | 20.3      | 14.4         | 37.4        | 444                                               | 27.2 (15.0,47.5)           | 25.0        | 40.7          |
| <b>China 2009</b>                        | 1954                                          | 37.7 (15.0,49.0)           | 27.7    | N/A      | 5.3       | N/A          | 19.9        | 1328                                              | 37.8 (15.0,49.0)           | 11.7        | 32.0          |
| <b>Colombia 2010</b>                     | 9066                                          | 29.0 (15.0,49.9)           | 22.2    | N/A      | 22.2      | N/A          | 8.1         | 5391                                              | 28.4 (15.0,49.9)           | 4.7         | 40.5          |
| <b>Ecuador 2012</b>                      | 5976                                          | 33.3 (19.0,49.0)           | 14.0    | 2.1      | 17.1      | N/A          | 13.3        | 4155                                              | 33.1 (19.0,49.0)           | 5.9         | 30.5          |
| <b>Great Britain 2014</b>                | 706                                           | 32.7 (15.0,49.0)           | 19.3    | 0.6      | 16.0      | N/A          | 10.6        | 475                                               | 33.0 (15.0,49.0)           | 5.7         | 32.7          |
| <b>Gujarat India 2011</b>                | 323                                           | 25.4 (15.0,45.0)           | 45.8    | N/A      | 19.5      | N/A          | 94.7        | 131                                               | 25.6 (15.0,45.0)           | 92.4        | 59.4          |
| <b>Liberia 2011</b>                      | 863                                           | 29.3 (15.0,49.0)           | 22.9    | N/A      | 13.7      | N/A          | 37.3        | 568                                               | 29.5 (15.0,49.0)           | 23.4        | 34.2          |
| <b>Laos 2006</b>                         | 1942                                          | 28.2 (15.0,49.9)           | 19.4    | 2.2      | 18.7      | 15.4         | 33.2        | 1060                                              | 29.2 (15.0,49.5)           | 28.6        | 45.4          |
| <b>Malawi 2016</b>                       | 766                                           | 28.4 (15.0,49.0)           | 14.2    | 2.1      | 16.1      | 15.1         | 21.5        | 459                                               | 29.1 (15.0,49.0)           | 12.0        | 40.1          |
| <b>Mexico 2006</b>                       | 3020                                          | 31.1 (15.1,50.0)           | 26.6    | N/A      | 24.9      | N/A          | 15.0        | 1620                                              | 29.8 (15.1,50.0)           | 9.2         | 46.4          |
| <b>Mexico 2012</b>                       | 3612                                          | 35.1 (15.6,50.0)           | 27.5    | N/A      | 21.8      | N/A          | 14.6        | 1955                                              | 34.8 (15.6,50.0)           | 8.5         | 45.9          |
| <b>Nigeria 2012</b>                      | 618                                           | 27.3 (15.0,49.0)           | 8.6     | 5.0      | 26.2      | 9.8          | 54.7        | 360                                               | 27.5 (15.0,45.0)           | 52.5        | 41.7          |
| <b>Papua New Guinea 2005<sup>‡</sup></b> | 779                                           | 29.3 (15.0,49.0)           | N/A     | 0.6      | 23.7      | N/A          | 40.0        | NA                                                | N/A                        | .           | 100.0         |
| <b>Pakistan 2011</b>                     | 4839                                          | 30.8 (16.0,49.0)           | 34.7    | 36.9     | 30.0      | N/A          | 49.1        | 1411                                              | 31.0 (16.0,49.0)           | 36.5        | 70.8          |
| <b>Rwanda 2010</b>                       | 596                                           | 31.1 (18.0,45.0)           | 3.9     | 2.2      | 15.3      | N/A          | 10.2        | 482                                               | 31.1 (18.0,45.0)           | 7.3         | 19.1          |
| <b>United States 2003-06</b>             | 3097                                          | 28.9 (15.0,49.9)           | 16.0    | 0.3      | 24.2      | N/A          | 9.4         | 1925                                              | 27.8 (15.0,49.9)           | 3.3         | 37.8          |
| <b>Vietnam 2010</b>                      | 1492                                          | 32.3 (15.0,49.0)           | 13.1    | N/A      | 6.6       | N/A          | 11.4        | 1200                                              | 32.5 (15.0,49.0)           | 7.0         | 19.6          |

Abbreviations and definitions: Anemia based hemoglobin (Hb) <120 g/L after Hb adjusted for 1) altitude when available (Afghanistan, Azerbaijan, Colombia, Ecuador, Great Britain, Laos, Malawi, Mexico 2006 and 2012, and Rwanda) otherwise no adjustment was applied or <1000m is assumed and no adjustment needed, and 2) smoking (Colombia, Ecuador, Mexico 06 and 2012, Great Britain and USA). ID, iron deficiency based on ferritin <15 ng/mL; N/A, indicator not assessed in survey; VAD, vitamin A deficiency based on retinol binding protein (RBP) or retinol <20.1 µg/dL (to convert to micromoles per liter, multiply by 0.0349), when available., INFL, inflammation based on C-reactive protein (CRP) > 0.5 mg/dL (to convert to milligrams per liter, multiply by 10) or α-1-acid glycoprotein (AGP) >1 g/L. \*\*Healthy defined as no inflammation, ID, VAD or malaria, if measured. Surveys dropped for Hb threshold analyses due to <100 “healthy” individuals. The Hb-sTfR curve analyses was based on data from all 17 surveys for each target group. The Hb threshold analyses were based on 21 surveys or 20 countries except for Burkina Faso and Papua New Guinea (lacked ferritin) which did not meet the inclusion criteria or did not have enough (>100) sample sizes after the exclusions.

**eTable 4: Results of One-Way Quantile Test Comparing Survey-Specific 5<sup>th</sup> Percentile Hb With Current WHO Hb Cutoffs for Defining Anemia in a Multinational Sample of Apparently Healthy Individuals**

| Preschool Children) | 5 <sup>TH</sup> ile Hb<br>95%CI | Ho: Survey 5 <sup>th</sup> ile Hb = 110<br>g/L<br>(WHO anemia cutoff*) | Non-Pregnant Women  | 5 <sup>TH</sup> ile Hb<br>95%CI | Ho: 5 <sup>th</sup> ile Hb = 120<br>g/L<br>(WHO anemia cutoff*) |
|---------------------|---------------------------------|------------------------------------------------------------------------|---------------------|---------------------------------|-----------------------------------------------------------------|
|                     |                                 | P                                                                      |                     |                                 | P                                                               |
| Pakistan 2011       | 79.0 (75.4,82.6)                | <.001                                                                  | Indian Gujarat 2011 | 88.3 (77.8,98.7)                | <.001                                                           |
| Cote D'Ivoire 2007  | 79.4 (66.2,92.6)                | <.001                                                                  | Nigeria 2012        | 89.8 (86.4,93.1)                | <.001                                                           |
| Bangladesh 2010     | 84.0 (82.3,85.6)                | <.001                                                                  | Pakistan 2011       | 91.1(88.0,94.2)                 | <.001                                                           |
| Kenya 2010          | 87.3 (77.9,96.8)                | <.001                                                                  | Cambodia 2014       | 98.3 (94.1,102.4)               | <.001                                                           |
| Afghanistan 2013    | 88.2 (82.0,94.5)                | <.001                                                                  | Cote D'Ivoire 2007  | 99.2 (96.9,101.4)               | <.001                                                           |
| Cambodia 2014       | 88.9 (85.1,92.8)                | <.001                                                                  | Afghanistan 2013    | 99.6 (95.7,103.5)               | <.001                                                           |
| Laos 2006           | 90.6 (85.5,95.7)                | <.001                                                                  | Laos 2006           | 101.9 (99.4,104.3)              | <.001                                                           |
| Liberia 2011        | 91.5 (87.9,95.1)                | <.001                                                                  | Cameroon 2009       | 103.3 (98.6,108.0)              | <.001                                                           |
| Philippines 2011    | 95.3 (92.8,97.7)                | <.001                                                                  | Azerbaijan 2013     | 108.8 (106.5,111.1)             | <.001                                                           |
| Kenya 2007          | 96.2 (84.5,107.9)               | <.001                                                                  | Liberia 2011        | 109.1 (107.6,110.6)             | <.001                                                           |
| Cameroon 2009       | 97.6 (93.0,102.2)               | <.001                                                                  | Bangladesh 2012     | 111.4 (108.9,113.8)             | <.001                                                           |
| Mexico 2006         | 98.0 (96.0,99.9)                | <.001                                                                  | China 2009          | 111.9 (110.2,113.6)             | <.001                                                           |
| Azerbaijan 2013     | 98.2 (95.5,101.0)               | <.001                                                                  | Mexico 2006         | 112.9 (110.8,115.0)             | <.001                                                           |
| Rwanda 2010         | 100.7 (98.1,103.3)              | <.001                                                                  | Malawi 2016         | 114.0 (112.1,115.9)             | <.001                                                           |
| Mexico 2012         | 100.8 (99.5,102.0)              | <.001                                                                  | Rwanda 2010         | 115.0 (111.7,118.4)             | <.001                                                           |
| Bangladesh 2012     | 101.5 (98.1,104.9)              | <.001                                                                  | Mexico 2012         | 116.0 (114.9,117.0)             | <.001                                                           |
| Ecuador 2012        | 102.0 (101.2,102.8)             | <.001                                                                  | Vietnam 2010        | 116.7 (115.3,118.1)             | <.001                                                           |
| Colombia 2010       | 102.7 (101.7,103.7)             | <.001                                                                  | Great Britain 2014  | 117.9 (115.7,120.1)             | .031                                                            |
| Malawi 2016         | 103.3 (99.7,106.8)              | <.001                                                                  | Ecuador 2012        | 118.4 (117.9,118.9)             | <.001                                                           |
| Nicaragua 2005      | 105.2 (104.0,106.5)             | <.001                                                                  | Colombia 2010       | 119.3 (118.5,120.1)             | .69                                                             |
| Vietnam 2010        | 109.6 (106.3,113.0)             | .65                                                                    | USA 2006            | 120.9 (120.0,121.7)             | .17                                                             |
| USA 2006            | 112.3(111.4,113.3)              | .99                                                                    |                     |                                 |                                                                 |

\*Population used did not exclude individuals with nutritional deficiencies, inflammation and or malaria (if measured). %ile - percentile. To convert Hb to grams per deciliter, divide by 10.

**eTable 5: Associations Between Hb Concentrations With Participant Age, Hb Analyzer, Type of Blood Sampling in a Multinational Sample of Apparently Healthy Individuals.**

| Fixed Effects                                             | Preschool Children 6-59mo(N=13,445) |       | Non-Pregnant Women 15-49y (N=25,880)                      |                   |       |
|-----------------------------------------------------------|-------------------------------------|-------|-----------------------------------------------------------|-------------------|-------|
|                                                           | $\beta$ (SE), g/L                   | P     | Fixed Effects                                             | $\beta$ (SE), g/L | P     |
| Age(months) categories                                    |                                     |       | Age(years) categories                                     |                   |       |
| 6-11                                                      | -9.2 (-10.2, -8.3)                  | <.01  | 15-19                                                     | -0.8 (-1.4, -0.1) | 0.02  |
| 12-18                                                     | -7.1 (-7.9, -6.3)                   | <.01  | 20-24                                                     | 0.0* (-0.6,0.6)   | 0.99  |
| 18-23                                                     | -5.3 (-6.2, -4.5)                   | <.01  | 25-29                                                     | -0.6 (-1.2,0.0)   | 0.06  |
| 24-35                                                     | -4.0 (-4.6, -3.4)                   | <.01  | 30-34                                                     | -1.1 (-1.7, -0.5) | <0.01 |
| 36-47                                                     | -1.3 (-1.9, -0.7)                   | <.01  | 35-39                                                     | -0.1 (-0.7,0.5)   | 0.76  |
| Ref (>=48mo)                                              | -                                   | -     | 40-44                                                     | -0.9 (-1.6, -0.3) | <0.01 |
| Child sex (ref: female)                                   | 0.1 (-0.3,0.5)                      | 0.65  | Ref (>=45)                                                | -                 | -     |
| Hemocue® v. automated hematology analyzer                 | -8.2 (-19.9,3.5)                    | 0.17  | Hemocue® v. automated Hematology analyzer                 | -15.5 (-35.2,4.1) | 0.12  |
| Hemocue® 201+ (v. non Hemocue 201+)                       | -1.1 (-8.2,6.1)                     | 0.77  | Hemocue® 201+ (ref: non Hemocue 201+)                     | -6.1 (-23.4,11.1) | 0.49  |
| Hemocue® 301 (v. non Hemocue 301)                         | -3.0 (-12.4,6.4)                    | 0.58  | Hemocue® 301 (ref: non Hemocue 301)                       | -8.2 (-27.1,10.6) | 0.39  |
| Venous v. Capillary                                       | -1.7 (-7.7,4.4)                     | 0.59  | Venous v. Capillary                                       | 7.8 (-0.5,16.1)   | 0.07  |
| <b><u>Variance decomposition (for Random effects)</u></b> | %                                   |       | <b><u>Variance decomposition (for Random effects)</u></b> | %                 |       |
| ICC: between surveys                                      | 19.3                                | <0.01 | ICC: between surveys                                      | 30.0              | <0.01 |
| ICC: between participants across all surveys              | 80.7                                |       | ICC: between participants across all surveys              | 70.0              |       |
| Model adjusted *conditional pseudo R <sup>2</sup>         | 25.9 %                              |       | Model adjusted *conditional pseudo R <sup>2</sup>         | 33.7%             | -     |

\* conditional pseudo R<sup>2</sup> based on both fixed and random effects. Age was mean centered across surveys. Healthy defined as no inflammation (CRP  $\leq$  0.5 mg/dL [to convert to milligrams per liter, multiply by 10] or  $\alpha$ -1-acid glycoprotein  $\leq$  1 g/L), no iron deficiency (based on ferritin <12 ng/mL for children and <15 ng/mL for women), no vitamin A deficiency (based on RBP or retinol  $\geq$ 20.1  $\mu$ g/dL [to convert to micromoles per liter, multiply by 0.0349]), and no known malaria. Estimates calculated from generalized linear mixed models using survey as random intercept. Hb values were adjusted for altitude when available (Afghanistan, Azerbaijan, Colombia, Ecuador, Great Britain, Laos, Malawi, Mexico 2006 and 2012, and Rwanda) otherwise no adjustment was applied or <1000m is assumed. Hb values further adjusted for smoking among women from (Colombia, Ecuador, Mexico 2006 and 2012, Great Britain and USA). \*Values non-zero but rounds to 0.00 at 2 decimal places.
